# Supplementary material for: In situ TPR removal: a generic method for fabricating tubular array devices with mechanical and structural soundness, and functional robustness on various substrates
Source: Royal Society of Chemistry journal article supplement (doi:10.1039/c2jm34606k), 2012-01-01

## Electronic Supplementary Information

**Title:** In-situ TPR Removal: A Generic Method for Fabricating Tubular Array Devices with Mechanical and Structural Soundness, and Functional Robustness on Various Substrates

**Authors:** Zhonghua Zhang, Haiyong Gao, Wenjie Cai, Caihong Liu, Yanbing Guo, and Pu-Xian Gao\*

**Address:** Department of Chemical, Materials and Biomolecular Engineering & Institute of Materials Science, University of Connecticut, Storrs, CT 06269-3136, USA, email: puxian.gao@ims.uconn.edu.

### 1. Experimental Section

#### *1.1. Preparation of ZnO, CeO<sub>2</sub>-ZnO and LSCO-ZnO composite NRAs on planar Si substrates:*

Before growth, a ZnO seed layer of 30 nm was deposited onto the thermally oxidized Si(100) substrate by a RF magnetron sputter (Torr International, Inc.) and annealed at 600°C for 2 h. The ZnO NRAs were further grown on the substrate using a hydrothermal method. In a typical synthesis, the Si substrate with ZnO seed layer was stucked onto a cap and floated in a container filled with 25 mL of zinc acetate (ZnAc<sub>2</sub>, 0.02 mol L<sup>-1</sup>) and hexamethylenetetramine (HMT, 0.02 mol L<sup>-1</sup>). Subsequently, the container was sealed and put into a water bath. The growth was carried out at 90°C for 5 h. Finally, the sample was cleaned several times with DI water and dried at 80°C overnight as the template.

The CeO<sub>2</sub> and LSCO nanofilms of ~100 nm were deposited on the ZnO NRAs template by a RF magnetron sputter. Both films were sputtered in  $7.38 \times 10^{-3}$  Torr of argon plasma. After sputtering, the CeO<sub>2</sub>-ZnO and LSCO-ZnO samples were annealed at 500°C and at 800°C for 3 hrs, respectively.

*1.2. Preparation of the CeO<sub>2</sub>-ZnO composite NRAs on 3D cordierite honeycomb:* The CeO<sub>2</sub>-ZnO composite NRAs on the cordierite honeycomb was prepared by in situ deposition of CeO<sub>2</sub> nano-layer on ZnO nanorod array. ZnO nanorod growth was conducted by a classic hydrothermal process. Equal molar zinc nitrate hexahydrate (Zn(NO<sub>3</sub>)<sub>2</sub>•6H<sub>2</sub>O) and hexamethylenetetramine (C<sub>6</sub>H<sub>12</sub>N<sub>4</sub>, HMT) (25 mM) were dissolved in 200 mL DI water as precursor. The substrate was then put in the prepared precursor solution to grow ZnO nanorod. After 2 hr growth of ZnO nanorod arrays at 75 °C, cerium nitrate hexahydrate (Ce(NO<sub>3</sub>)<sub>3</sub>•6H<sub>2</sub>O, 125 mM) was then added into the solution. After rinsing and drying, the ZnO-CeO<sub>2</sub> core-shell nanorod arrays were obtained on the 3D cordierite substrate.

## 2. Supporting Results

**Figure S1.** (a) SEM images, (b) EDX, (c) TEM and (d) SAED patterns of the  $\text{CeO}_2/\text{ZnO}$  composite NRAs on the thermal oxidized Si substrate.

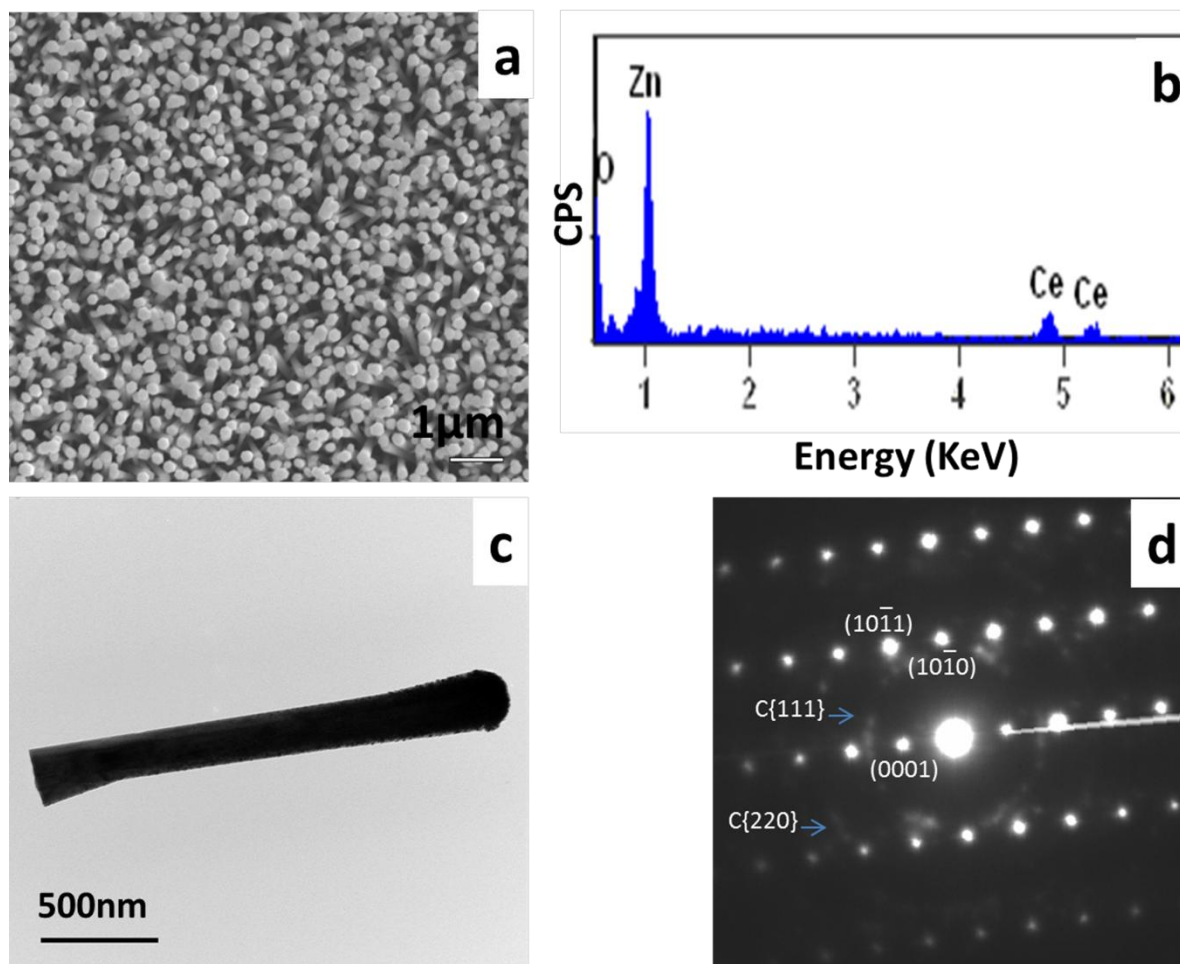

**Figure S2.** (a) SEM images, (b) EDX, (c) TEM and (d) SAED patterns of the LSCO/ZnO composite NRAs on the thermal oxidized Si substrate.

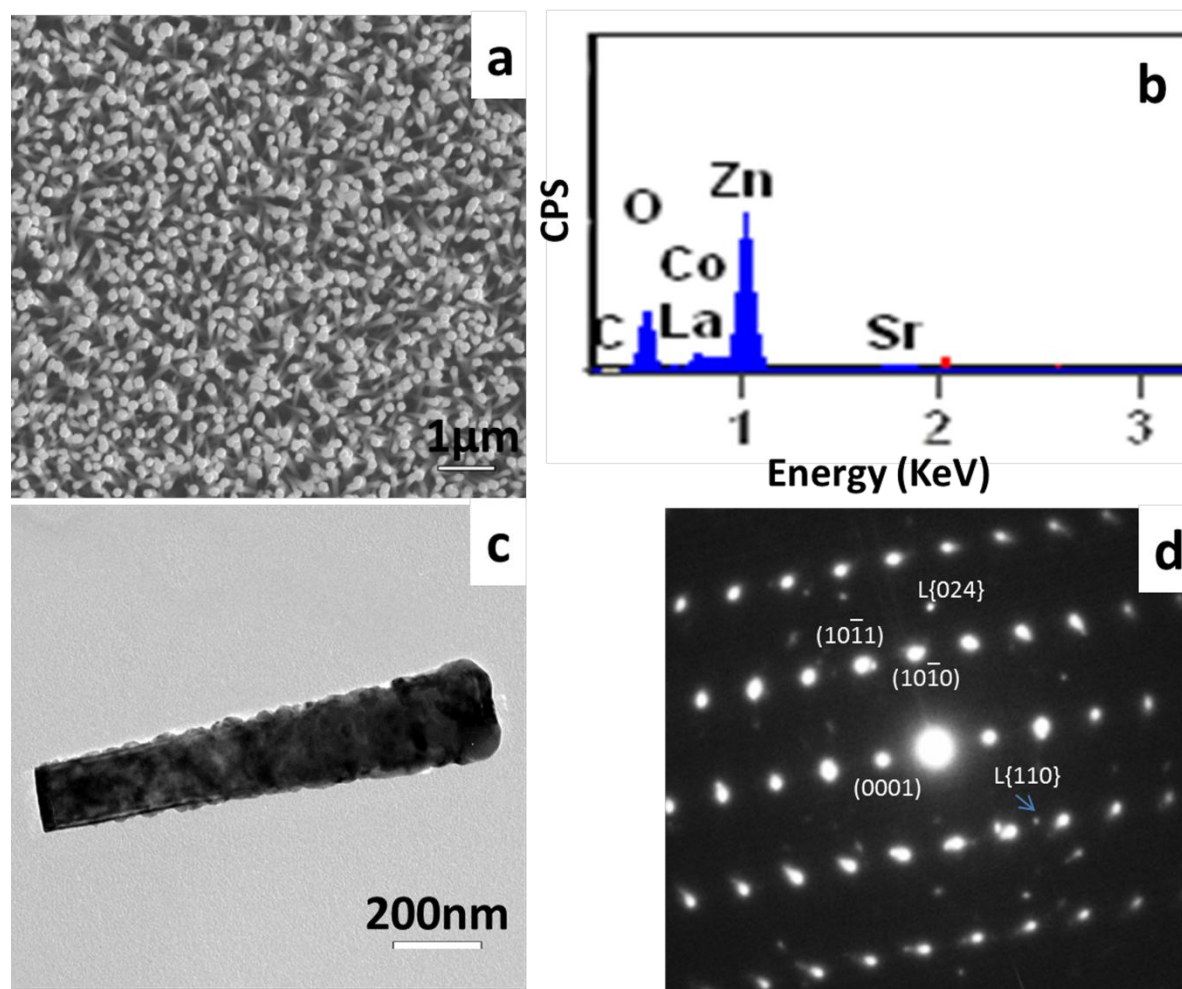

**Figure S3.** (a) EDX, (b) XRD, (c) TEM and (d) SAED patterns of the  $\text{CeO}_2$  NTAs on 3D cordierite honeycomb (CH) substrates. As shown in Figure S3b, the diffraction peaks from  $\text{CeO}_2$  were covered by the strong diffraction peaks from the 3D cordierite substrate. As seen from electron diffraction in Figure S3d, there exist obvious diffraction rings from  $\text{CeO}_2$  because the inference from the substrate has been eliminated.

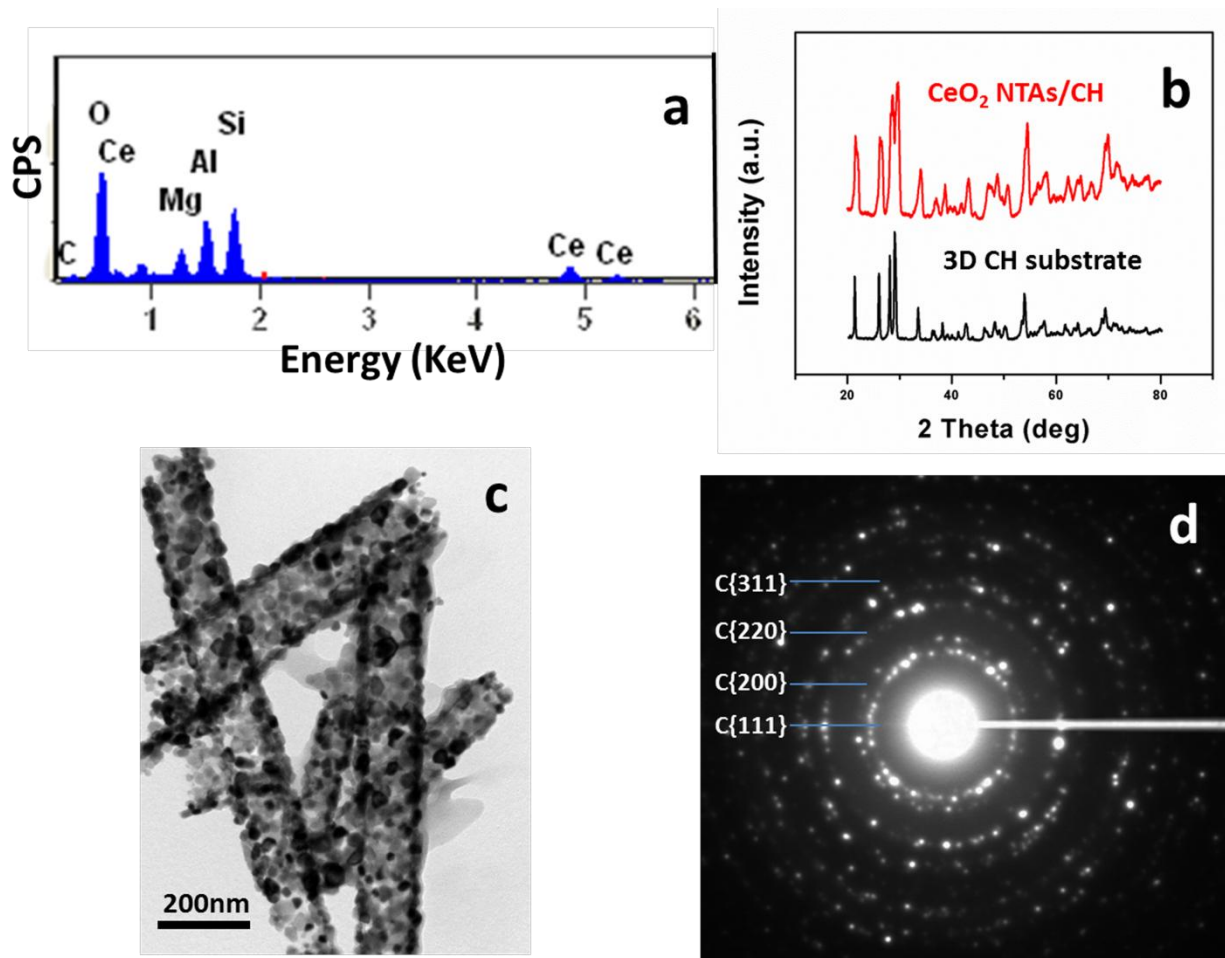

**Figure S4.** (a) top view and (b) tilted (45°) SEM images, and (c) EDX patterns of the CeO<sub>2</sub> NTAs on the thermal oxidized Si substrate after the photocatalysis for 4 hrs.

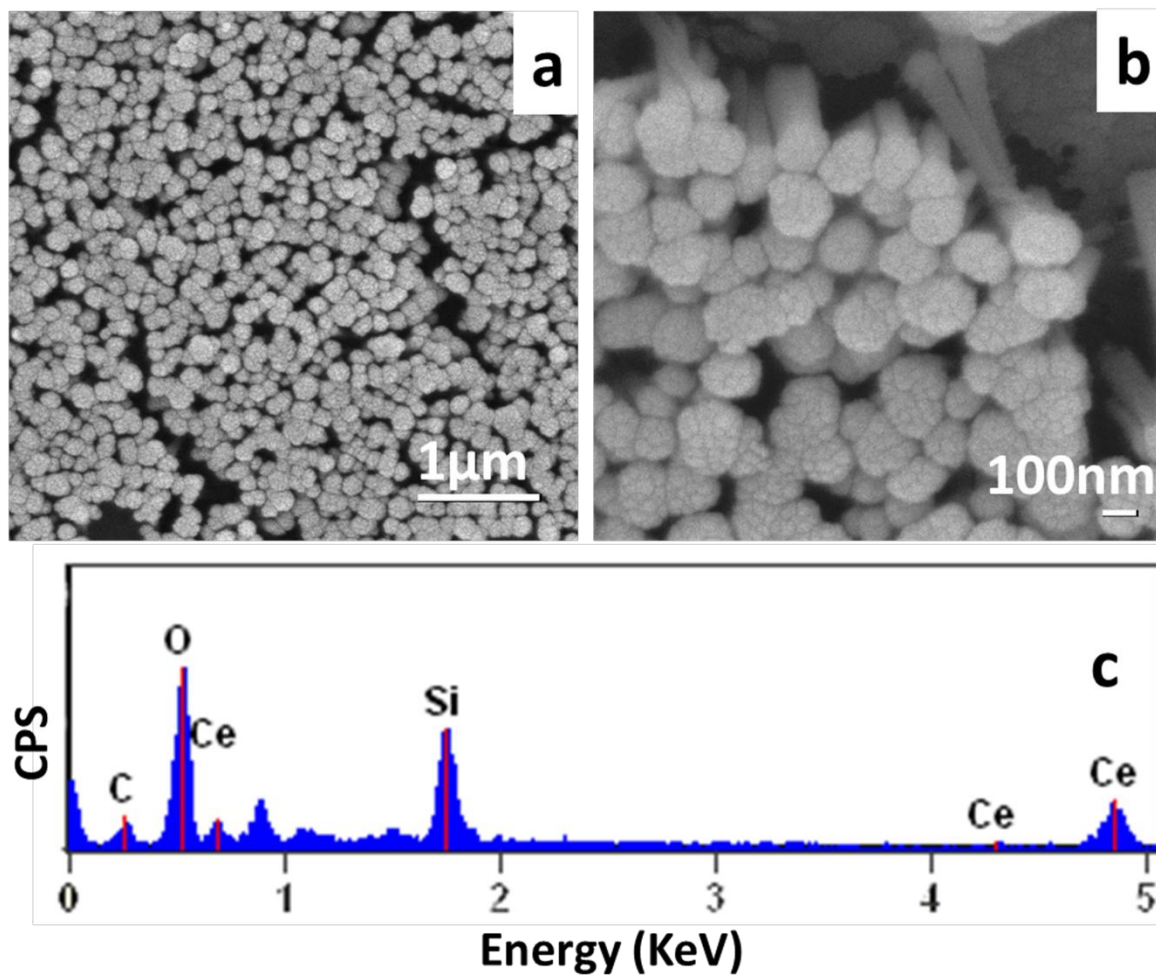

Supplement: c2jm34606k.pdf [file c2jm34606k.pdf]
